# Supplementary material for: Pregelatinized Drum-Dried Wheat Starch of Different Swelling Behavior as Clean Label Oil Replacer in Oil-in-Water Emulsions
Source: MDPI journal article supplement (doi:10.3390/foods11142044), 2022-07-11
Supplement: s1 [file s1]

# Pregelatinized drum-dried wheat starch of different swelling behavior as clean-labeled oil replacers in oil-in-water emulsions

Laura Roman, Mitchell R. Walker, Nicole Detlor, Janice Best, Mario M. Martinez

**Table S1.** Molecular weight, polydispersity index, amylose content, amylose and amylopectin chain length and ratios between amylose and amylopectin chains of the pregelatinized drum-dried starches.

| Sample   | $M_w$<br>( $\times 10^8$ g/mol) | Polydispersity<br>( $M_w/M_n$ ) | Am content<br>(%) | $X_{Am}$ (DP)    | $X_{Ap1}$ (DP)    | $X_{Ap2}$ (DP)    | $h_{Ap2}/h_{Ap1}$ | $h_{Am}/h_{Ap1}$   |
|----------|---------------------------------|---------------------------------|-------------------|------------------|-------------------|-------------------|-------------------|--------------------|
| Pregel 1 | 2.30[a] $\pm$ 0.21              | 1.91[a] $\pm$ 0.20              | 28.7[a] $\pm$ 0.1 | 1738[b] $\pm$ 59 | 14.6[a] $\pm$ 0.0 | 37.6[b] $\pm$ 0.1 | 0.54[a] $\pm$ 0.0 | 0.17[a] $\pm$ 0.01 |
| Pregel 2 | 2.22[a] $\pm$ 0.23              | 2.06[a] $\pm$ 0.24              | 28.1[a] $\pm$ 0.8 | 1640[a] $\pm$ 44 | 14.2[a] $\pm$ 0.1 | 36.5[a] $\pm$ 0.2 | 0.55[a] $\pm$ 0.0 | 0.18[a] $\pm$ 0.01 |
| Pregel 3 | 1.97[a] $\pm$ 0.17              | 1.91[a] $\pm$ 0.20              | 27.6[a] $\pm$ 0.7 | 1625[a] $\pm$ 66 | 14.4[a] $\pm$ 0.0 | 36.5[a] $\pm$ 0.6 | 0.58[a] $\pm$ 0.1 | 0.18[a] $\pm$ 0.01 |

Values with different letter between brackets for each column parameter denotes significant differences between starches at a significance level of  $p < 0.05$ .

$M_w$ , weight-average molecular weight;  $M_n$ , number-average molecular weight; Polydispersity; ratio between  $M_w$  and  $M_n$ ; Am and Ap stands for amylose and amylopectin, respectively. DP, Degree of polymerization;  $X_{Ap1}$ , DP of peak maximum of short (A + B1) amylopectin chains;  $X_{Ap2}$ , DP of peak maximum of long (B2 + B3) amylopectin chains;  $X_{Am}$ , DP of peak maximum of amylose chains;  $h_{Ap2}/h_{Ap1}$ , ratio between the height of Ap2 to Ap1 peak height in SEC weight molecular size distribution;  $h_{Am}/h_{Ap1}$ , ratio between the height of Am to Ap1 peak height in SEC weight molecular size distribution.

**Table S2.** Peak maximum viscosity and final viscosity obtained from the pasting profiles of the pregelatinized drum-dried starches.

| Sample   | Cold Peak<br>Viscosity (mPa·s) | Final Viscosity<br>(mPa·s) |
|----------|--------------------------------|----------------------------|
| Pregel 1 | 8360[a] ± 43                   | 1969[a] ± 13               |
| Pregel 2 | 12833[b] ± 6                   | 2185[b] ± 40               |
| Pregel 3 | 14340[c] ± 50                  | 3115[c] ± 33               |

Values with different letter between brackets for each column parameter denotes significant differences between starches at a significance level of  $p < 0.05$ .

**Figure S1.** Differential scanning calorimetry curves of drum-dried starches scanned at 10°C/min from 25 to 95°C after 24 h of hydration with a 1:3 starch:water ratio. Arrow indicates the presence of an endothermal transition in Pregel 1 starch presumably corresponding to the gelatinization of amylopectin double helices as previously reported for native wheat starch [45].

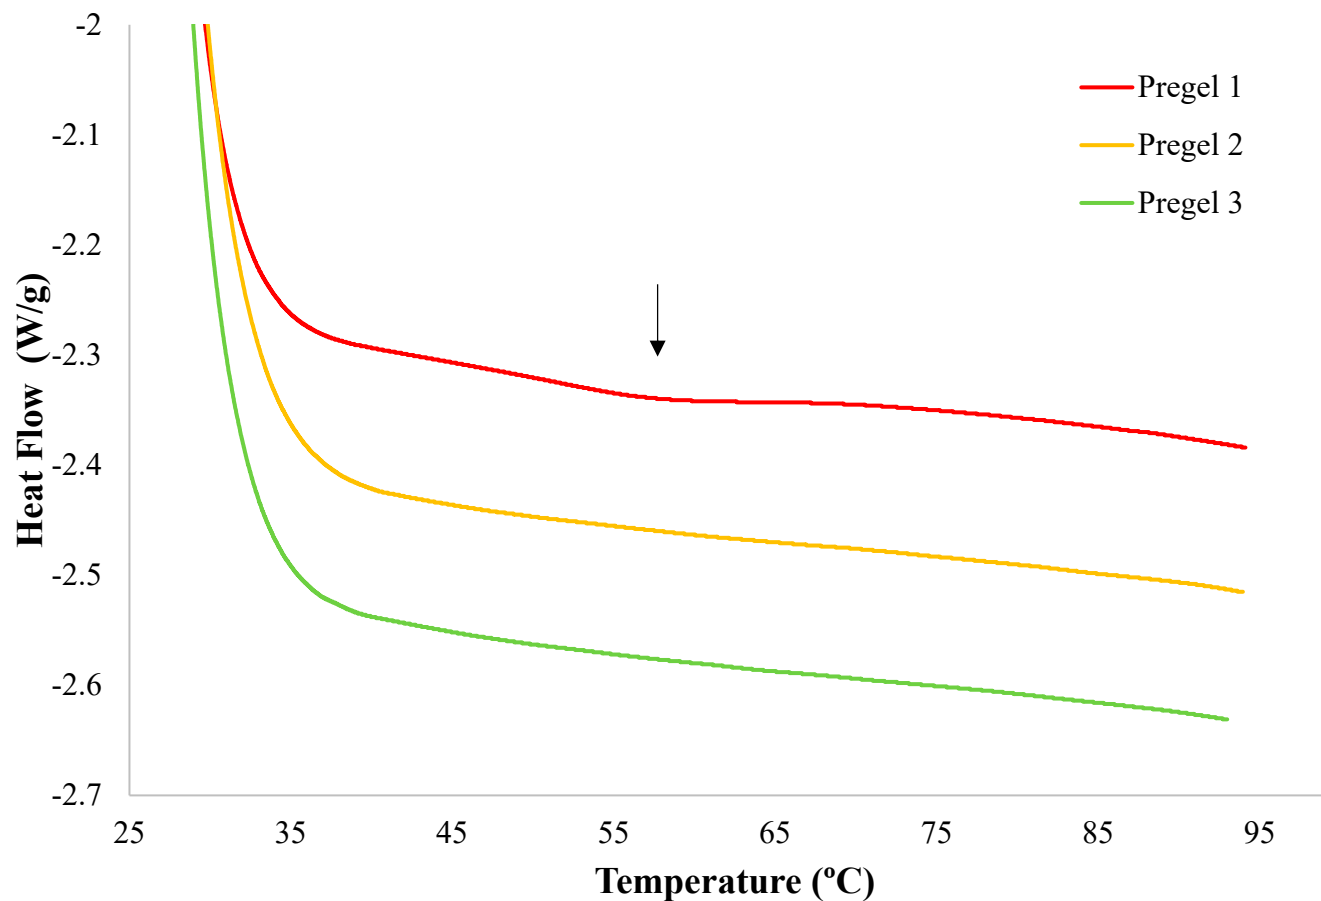

45. Sasaki, T., Matsuki, J. Effect of wheat starch structure on swelling power. *Cereal Chem.* **1998**, 75, 525–529.
